# Supplementary material
Source: publisher figshare collection journal article supplement (https://acs.figshare.com/ndownloader/files/4471864)
Supplement: Supplementary file 1 [file 4471864]

# Formation of Nanopatterned Polymer Blends in Photovoltaic Devices

*Ximin He<sup>1,2</sup>, Feng Gao<sup>3</sup>, Guoli Tu<sup>2</sup>, David Hasko<sup>3</sup>, Sven Hüttner<sup>3</sup>, Ullrich Steiner<sup>3,4</sup>, Neil C. Greenham<sup>3\*</sup>, Richard H. Friend<sup>3\*</sup>, Wilhelm T. S. Huck<sup>1,2,5\*</sup>*

- (1) The Nanoscience Centre, University of Cambridge, 11 J. J. Thomson Avenue,  
Cambridge CB3 0FF, United Kingdom.
- (2) Melville Laboratory, Department of Chemistry, University of Cambridge,  
Lensfield Road, Cambridge CB2 1EW, United Kingdom.
- (3) Cavendish Laboratory, Department of Physics, University of Cambridge, J. J.  
Thomson Avenue, Cambridge CB3 0FF, United Kingdom.
- (4) Freiburg Institute for Advanced Studies (FRIAS) University of Freiburg, D-  
79104 Freiburg, Germany
- (5) Radboud University Nijmegen, Institute for Molecules and Materials,  
Heyendaalseweg 135, 6525 AJ Nijmegen, The Netherlands

*Materials:* Regioregular P3HT ( $M_w$   $8.7 \times 10^4$ ) for imprinted PV cells was from Merck Chemicals and used after being purified by Soxhlet extraction. Regioregular P3HT ( $M_w$   $5.0 \times 10^4$ ) for blend control cells was used as received from Rieke Metal. F8TBT ( $M_w$   $5.3 \times 10^4$ ) or synthesized in the Melville laboratory, University of Cambridge.

*Device Fabrication:* 65-85 nm thick P3HT and F8TBT films were spun cast from  $\text{CHCl}_3$  solution (both  $10 \text{ mg ml}^{-1}$ ) on PEDOT:PSS coated ITO/glass substrates and Si or Kapton polyimide film substrates coated with thermally evaporated Al cathode (80 nm thick), respectively. Solvent-vapor assisted nanoimprint lithography (SANIL) on P3HT films used a sequence of swelling by saturated  $\text{CHCl}_3$  vapor : nitrogen (9:1) flow (50sccm) for 30-50 minutes, imprinting at room temperature by Si mold for 20 min, and then quenching by  $\text{N}_2$  flow (20 sccm) for 60 min, followed by annealing at  $120^\circ\text{C}$  for 5 minutes in glove box to remove residual solvent. Subsequently, F8TBT was imprinted by pre-patterned P3HT film using SANIL in the same procedure with saturated  $\text{CH}_2\text{Cl}_2$  vapor:  $\text{N}_2$  (9:1) flow (50sccm). Imprinted PV cells were annealed at  $120^\circ\text{C}$  for 10 minutes after cathode deposition. A blend control device was fabricated by spincoating 70 nm thick P3HT:F8TBT blend film from xylene solution ( $7.5 \text{ mg ml}^{-1}$  for both P3HT and F8TBT), followed by thermal evaporation of 100 nm Al electrode and subsequent post-annealing at  $140^\circ\text{C}$  for 10 minutes. All devices were encapsulated by epoxy resin in glove box for measurements.

*Device Testing:* Current-voltage (J-V) characteristics were measured in air at room temperature using a Keithley 237 source-measure unit. The photocurrent spectra were recorded with illumination from a Xenon lamp dispersed through a single-grating monochromator. The current-voltage characteristics under AM1.5G illumination were measured using a solar simulator (Oriel Instruments 81160) at an intensity equivalent to  $100 \text{ mW/cm}^2$  after correction for spectral mismatch.
